# Supplementary material for: Heterogeneity and Plasticity of Human Breast Cancer Cells in Response to Molecularly-Targeted Drugs
Source: PubMed Central journal article supplement (PMC6803545; doi:10.3389/fonc.2019.01070), 2019-10-15
Supplement: Data_Sheet_1.pdf [file Data_Sheet_1.pdf]

**Supplementary Table 1.** The primer sets included in the microarrays used in this study

| Target              | Forward Sequence                | Reverse Sequence                |
|---------------------|---------------------------------|---------------------------------|
| ABL1                | CTC CGG GTC TTA GGC TAT AA      | GTT GAC TGG CGT GAT GTA G       |
| ACVR1               | TGAGCAATGGTATAGTGGAGGATTAC      | CAGACTACCTTCCTCATATCTTCAAAC     |
| AKT1                | CAT CAG ATG AGG AGA ATG GG      | GGA AGT CGC TGG TGT TAA G       |
| ATG13               | CAA CCT GCA CCC CTT CTG         | TTT CGG ACA AAG ATG GTC TCC     |
| BAD                 | AAC GCA GAT GCG GCA AA          | TGG AGT TTC GGG ATG TGG A       |
| BAX                 | CAC TGA AGC GAC TGA TGT C       | TCA GCC CAT CTT CTT CCA         |
| $\beta$ -Actin      | CAC ACA GGG GAG GTG ATA GC      | GAC CAA AAG CCT TCA TAC ATC TCA |
| BCL2                | GCG GCC TCT GTT TGA TTT         | TCA CTT GTG GCC CAG ATA         |
| BIRC3               | GCT CGT GCT GGT TTC TAT         | CAG TAG GAC TGT CTC CTC TT      |
| BIRC6               | GTG CTG ATT ATG GGA CCT AC      | GTC TGT GAT CCG TTC TTC TC      |
| BIRC8               | GCT GAA GCA GTT GAC AGA         | CAC ACC CAC TGT AGA GTT AC      |
| BRAF                | CAG CGA GAA AGG AAG TCA TC      | TCT GCC CAT CAG GAA TCT         |
| CD40                | AAC TGT AGA TTG TGT GCA GGC TA  | AGG CAA TGT TCA GCT TCA GA      |
| CDK4                | GAT CTG ATG CGC CAG TTT CTA     | CCA CCA CTT GTC ACC AGA AT      |
| CDK6                | GAC CAG CAG CGG ACA AAT A       | TGA CGA CCA CTG AGG TTA GA      |
| CXCR4               | GCC TTA TCC TGC CTG GTA TT      | ATG AGG ATG ACT GTG GTC TTG     |
| Cyclin D1           | GCG GAG GAG AAC AAA CAG AT      | GAG GGC GGA TTG GAA ATG A       |
| 4EBP1               | AAT AGC CCA GAA GAT AAG CGG     | ACT TTC ATA AGG CCT GGC TG      |
| EGFR                | GCG CTA CCT TGT CAT TCA         | CGT CGT CCA TGT CTT CTT C       |
| EIF4                | GAG GAC GAT GGC TAA TTA CAT TGA | GCA CAG AAG TGT CTC TAG CCA AAA |
| FAK                 | CTC TCT CGA GGC AGT ATT GA      | GCT GCA GGA TCT GGT TTA C       |
| FOS                 | CTG AAG ACC GAG CCC TTT GA      | GGA GCG GGC TGT CTC AGA         |
| gp-130              | GGG AGT GCT GTT CTG CTT TA      | GTG ACC ACT GGG CAA TAT GA      |
| HER2                | ATA TGT CTC CCG CCT TCT         | TTC CCG GAC ATG GTC TAA         |
| HIF-1               | CCA ACC TCA GTG TGG GTA TAA G   | TTT GAT GGG TGA GGA ATG GG      |
| HPRT1               | TCT GTG GCC ATC TGC TTA         | AGG AAT GCA GCA ACT GAC         |
| IL2RG               | ACC ACT GTT TGG AGC ACT T       | GTT TCT GCC CAT CCA CAC TA      |
| IL6                 | AAA GAG GCA CTG GCA GAA A       | CAG GCA AGT CTC CTC ATT GAA     |
| Importin $\alpha$ 3 | TCA GCC ACC AGG AAG TTA AAG     | TGC TGG GAA GTG TGA AAG AG      |
| JAK1                | CTA CCG GAT GAG GTT CTA TTT C   | GGG TTG CAT CTG GAA TCT T       |
| JAK2                | AAC TGC AGA TGC ACA TCA TTA CCT | TCG AAA TTG GGC CAT GAC A       |
| JAK3                | ACC AGC AGA GGG ACT TT          | CAT AGC TGA CAC CAC GAT AC      |
| JUN1                | GAG AGG AAG CGC ATG AGG AA      | TCC AGC CGG GCG ATT             |
| KRAS                | GCT CAG GAC TTA GCA AGA AG      | GCA TCA TCA ACA CCC TGT         |
| LEPTIN R            | TCA GCT ACA TCC CTG CTA GT      | TCC AGT CAC TCC AGA TTC CT      |
| MAPK1               | GTA CAG GAC CTC ATG GAA AC      | CCT CTG AGG ATC TGG TAG AG      |
| MAPK3               | CTG AAC TCC AAG GGC TAT AC      | TGA GCT GAT CCA GGT AGT         |
| MAPK4               | ACC TGG ACG TGT TCA TCT         | TGA GGT CGC CCA GTT TAT         |
| MAPK5               | CCG GCA CTT TAC AGA GAA G       | TTC AGG CTT GAG GTC TCT         |
| MAPK6               | GGA GAC AGA CTT GGC TAA TG      | GCT GGT TTG AGA TCT CTG TG      |
| MAPK7               | CGC ATT AAG GAG GCC ATT         | GGA CTG GGC ATT TCA ACA         |
| MAPK8               | GGT GCA TCA TGG GAG AAA         | TGG TGT TCC AAG CTG TTC         |
| MEK                 | AGC TGG AGC TGA TGT TTG         | CCA TTC CGT ATG AGC TAA GG      |
| MEKK                | GAG ACA GCC CAG ACA ATA AA      | CCC GGA GCA TCA CAA ATA G       |
| MCL-1               | CCT TTG TGG CTA AAC ACT TGA AG  | CGA GAA CGT CTG TGA TAC TTT CTG |
| MDM2                | GCA GTG AAT CTA CAG GGA CG      | GTG CAT TTC CAA TAG TCA GCT AAG |
| mLST8               | AT CCA CAT CTG GGA CTT GA       | ATT CCA GAC ATA GCA GTT TCC     |
| mTOR                | GGC CGG AGT GTT AGA ATA TG      | CTT GTC ATA GGC CAC AAG G       |

|          |                                 |                                  |
|----------|---------------------------------|----------------------------------|
| MYC      | TGG TCT TCC CCT ACC CTC TCA     | AGA ATC CGA GGA CGG AGA GAA      |
| NFKB     | AAT GGG CTA CAC CGA AGC AA      | CAG CGA GTG GGC CTG AGA          |
| PDK1     | ACA TGG TTG CAG GTC TCT AGT TT  | AAG TAC TGA ACA TTC TGG CTG GT   |
| PI3K     | CCG AAA GGG TGC TAA AGA G       | TGA GGT ACT GGC CAA AGA          |
| PTEN     | GGG ACG AAC TGG TGT AAT G       | GAA ATC TAG GGC CTC TTG TG       |
| P21      | GCG ACT GTG ATG CGC TAA T       | GTG GTG TCT CGG TGA CAA AG       |
| P27      | GAG CAA TGC GCA GGA ATA AG      | TCC ACA GAA CCG GCA TTT          |
| P53      | GCG TGT GGA GTA TTT GGA TG      | TGT AGT GGA TGG TGG TAC AG       |
| RPS6KA5  | GAC ACT GCA GCC CAG CAA         | CCT AAG CTA CTG AGT CCG AGA ACTG |
| SOCS1    | CGC CCT TAG CGT GAA GAT G       | GCT GCC ATC CAG GTG AAA          |
| SOCS3    | CCA CTC TTC AGC ATC TCT GTC     | TCG TAC TGG TCC AGG AAC T        |
| STAT1    | GTT CAC TAT AGT TGC GGA GAG     | AGG GTC ATG TTC GTA GGT          |
| STAT2    | AGG AAA GGG CAG CAA TAA G       | CTT CAG ACC CTG GTA GGT AT       |
| STAT3    | ACA ACA TGT CAT TTG CTG AAA TCA | TCC TTG GGA ATG TCA GGA TAG AG   |
| STAT4    | GAA AGC CAT CTC GGA GGA ATA A   | CGG CCT TTA TTG TAG GGT TCT      |
| STAT5    | TTC TGG CAG TGG TTT GAC         | GTG GGC CTG TTG CTT ATT          |
| SRC      | CAG GCT GAG GAG TGG TAT T       | CCT TTC GTG GTC TCA CTT TC       |
| Survivin | CCC CTC GGG CCA ACT G           | CAG TTT GGC TTG CTG GTC TCT      |
| S6K1     | AAT CCG ATC ACC TCG AAG ATT TAT | CTG TGC TGG CCG AAG CA           |
| TSC1     | GCA AAA GGA AAC ACA GAG GAA G   | AGA CTT GCT GGG TAA AGG C        |
| TSC2     | TCG CAA GGA TGG TTC AGA TG      | GAC AGA GGG TAA CGA TGA ACA G    |
| VEGF     | TGC TGT CTT GGG TGC ATT         | ATT CTG CCC TCC TCC TTC T        |
| XIAP     | CGT GCG GTG CTT TAG TT          | GAC TGC GTG GCA CTA TTT          |
