# Supplementary material for: Heterogeneity and Plasticity of Human Breast Cancer Cells in Response to Molecularly-Targeted Drugs
Source: PubMed Central journal article supplement (PMC6803545; doi:10.3389/fonc.2019.01070), 2019-10-15
Supplement: Data_Sheet_2.pdf [file Data_Sheet_2.pdf]

**Supplementary Table 2.** Information regarding the siRNAs used for the protein silencing experiments

| <b>Target</b> | <b>Catalogue Number</b> | <b>Sequence</b>                        |
|---------------|-------------------------|----------------------------------------|
| AKT1          | SI00299145              | Sense: 5'-UCACACCACCUGACCAAGATT-3'     |
|               |                         | Antisense: 5'-UCUUGGUCAGGUGGUGUGATT-3' |
| BCL2          | SI00299397              | Sense: 5'-CAUUAUAAGCUGUCGCAGATT-3'     |
|               |                         | Antisense: 5'-UCUGCGACAGCUUAUAAUGGA-3' |
| BIRC8         | SI00146202              | Sense: 5'-CGAGGUGCUCACUGCGCAATT-3'     |
|               |                         | Antisense: 5'-UUGCGCAGUGAGCACCUCGTG-3' |
| EGFR          | SI00300104              | Sense: 5'-GCUCACGCAGUUGGGCACUTT-3'     |
|               |                         | Antisense: 5'-AGUGCCCAACUGCGUGAGCTT-C' |
| EIF4          | SI00300125              | Sense: 5'-GAGCGGCUCCACCACUAAATT-3'     |
|               |                         | Antisense: 5'-UUUAGUGGUGGAGCCGCUCTT-3' |
| HER2          | SI00300195              | Sense: 5'-GUGUGCACCGGCACAGACATT-3'     |
|               |                         | Antisense: 5'-UGUCUGUGCCGGUGCACACTT-3' |
| JAK3          | SI00604800              | Sense: 5'-GGAGAUUCAGAUCUCAATT-3'       |
|               |                         | Antisense: 5'-UUUGAGGAUCUGAAUCUCCCG-3' |
| MAPK7         | SI00606039              | Sense: 5'-GACCCACCUUUCAGCCUUATT-3'     |
|               |                         | Antisense: 5'-UAAGGCUGAAAGGUGGGUCTG-3' |
| RPS6KA5       | SI02225433              | Sense: 5'-GCCAGUCAUUCGAGAUGAATT-3'     |
|               |                         | Antisense: 5'-UUCAUCUCGAAUGACUGGCTT-3' |
| SOCS3         | SI00058345              | Sense: 5'-GGGAGUUCUGGACCAGUATT-3'      |
|               |                         | Antisense: 5'-UACUGGUCCAGGAACUCCCGA-3' |
