# Supplementary material for: Heterogeneity and Plasticity of Human Breast Cancer Cells in Response to Molecularly-Targeted Drugs
Source: PubMed Central journal article supplement (PMC6803545; doi:10.3389/fonc.2019.01070), 2019-10-15

Supplementary Figure 1A.  
Scatterplots for protein  
expression profile -  
Ruxolitinib

MDA-MB-231 WT

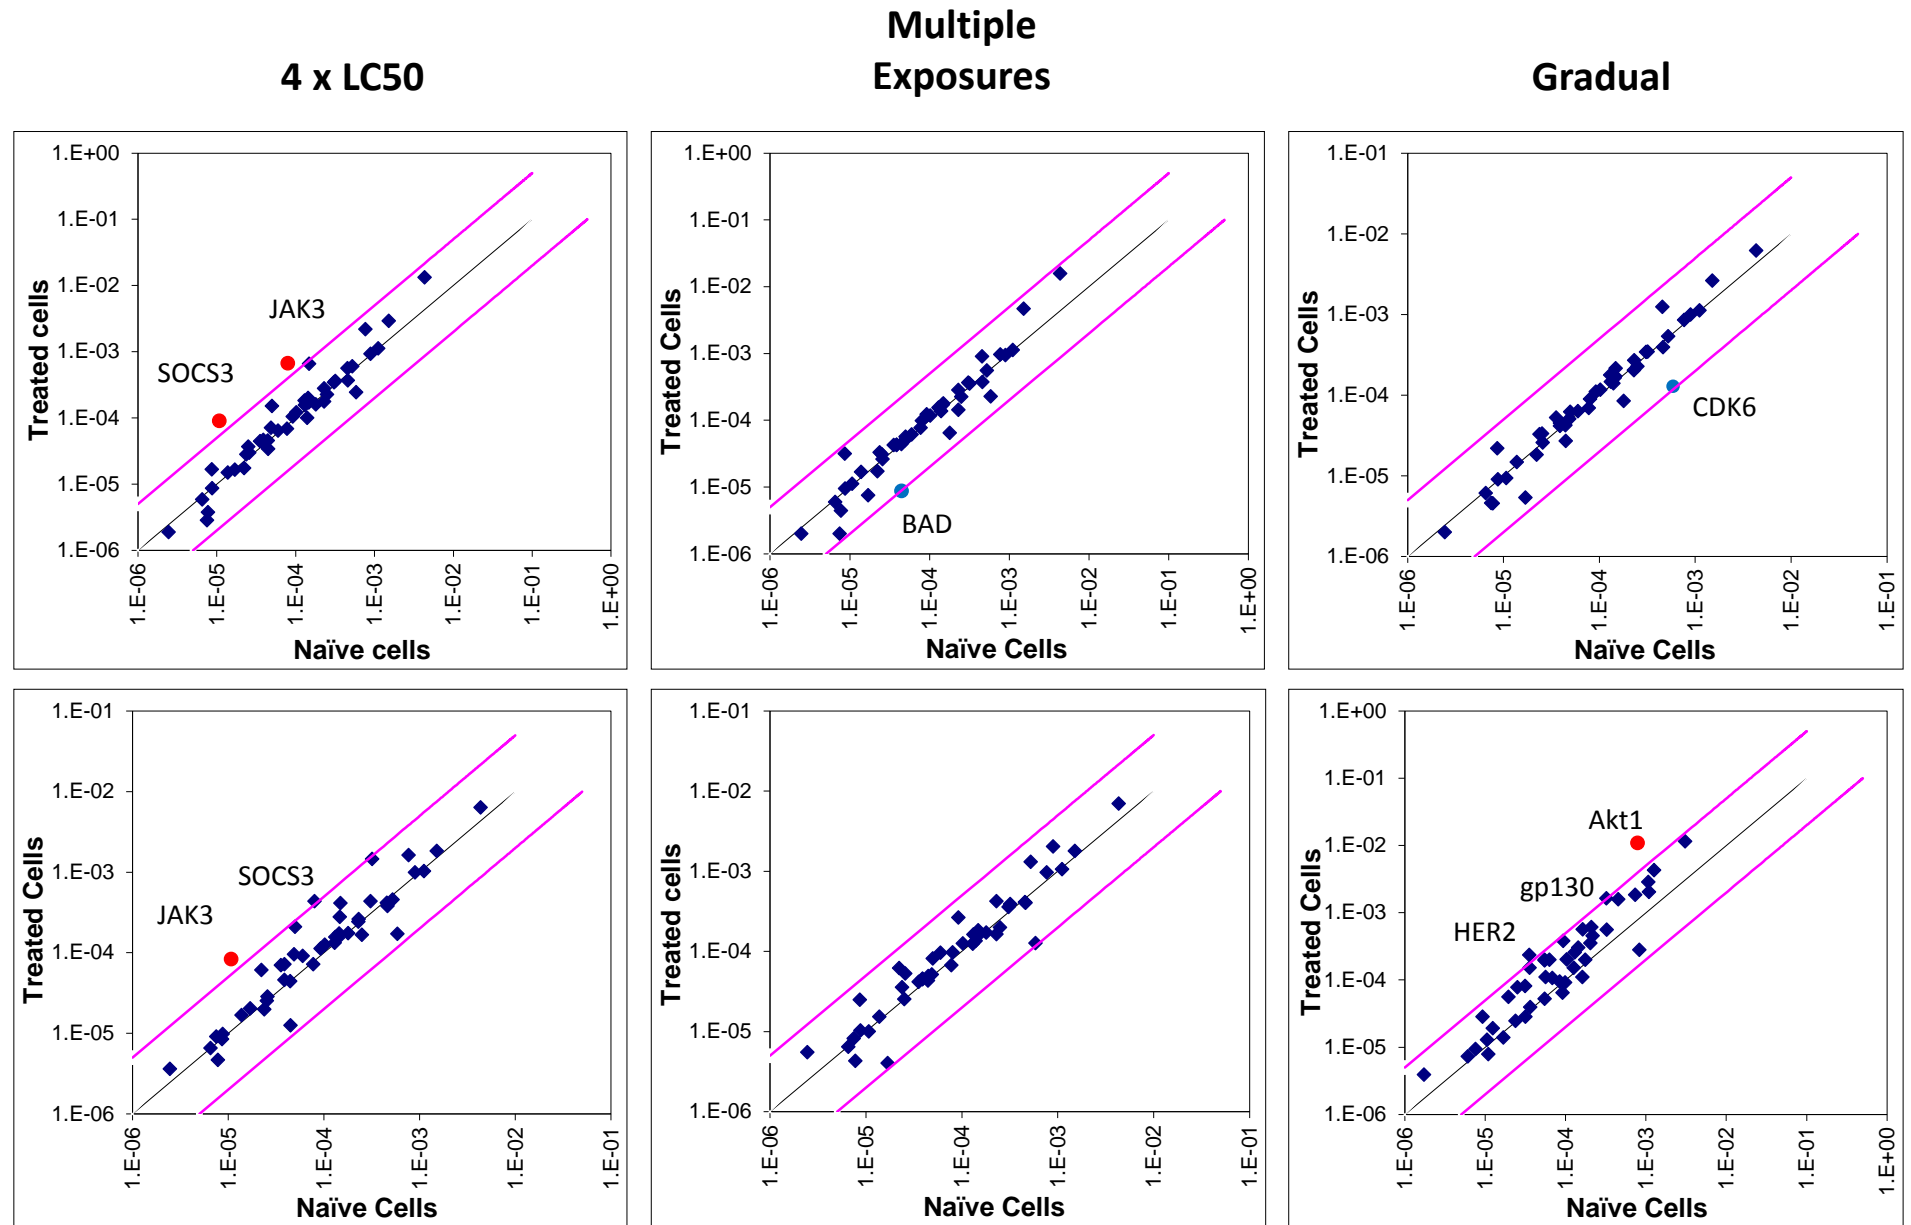

Supplementary Figure 1B.  
Scatterplots for protein  
expression profile -  
Everolimus

MDA-MB-231 WT

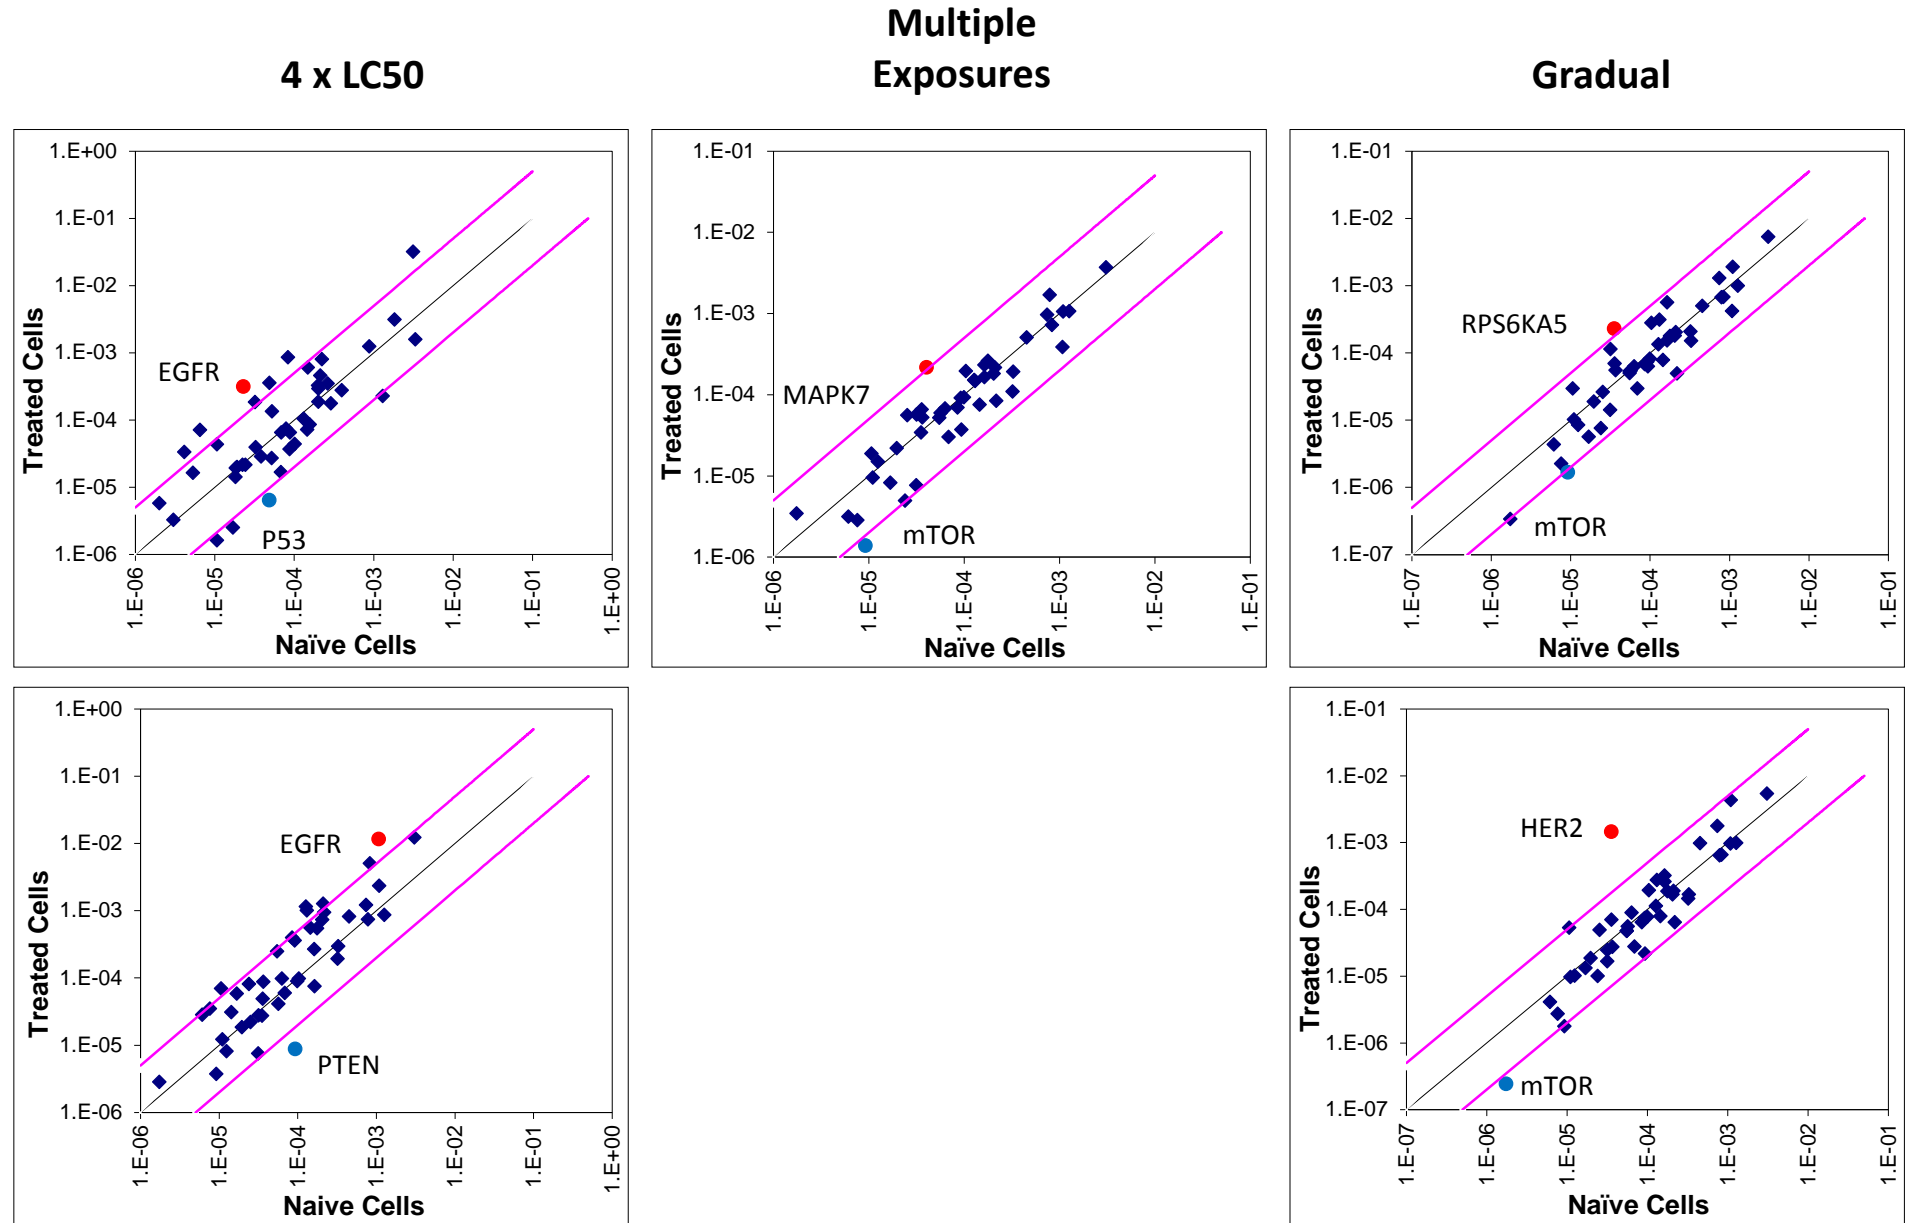

Supplementary Figure 1C.  
Scatterplots for protein  
expression profile -  
Erlotinib

MDA-MB-231 WT

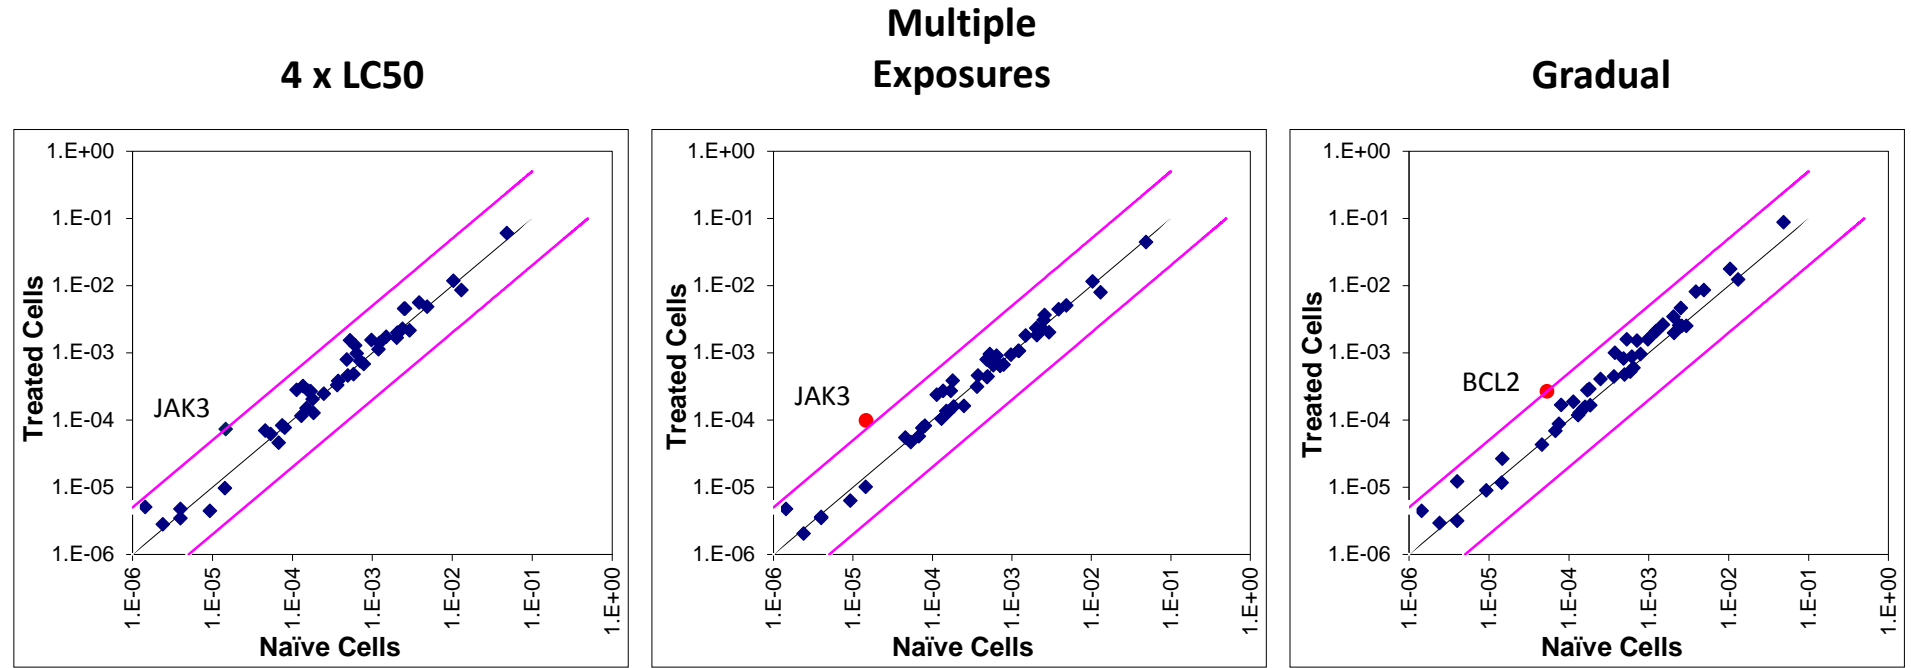

MDA-MB-468

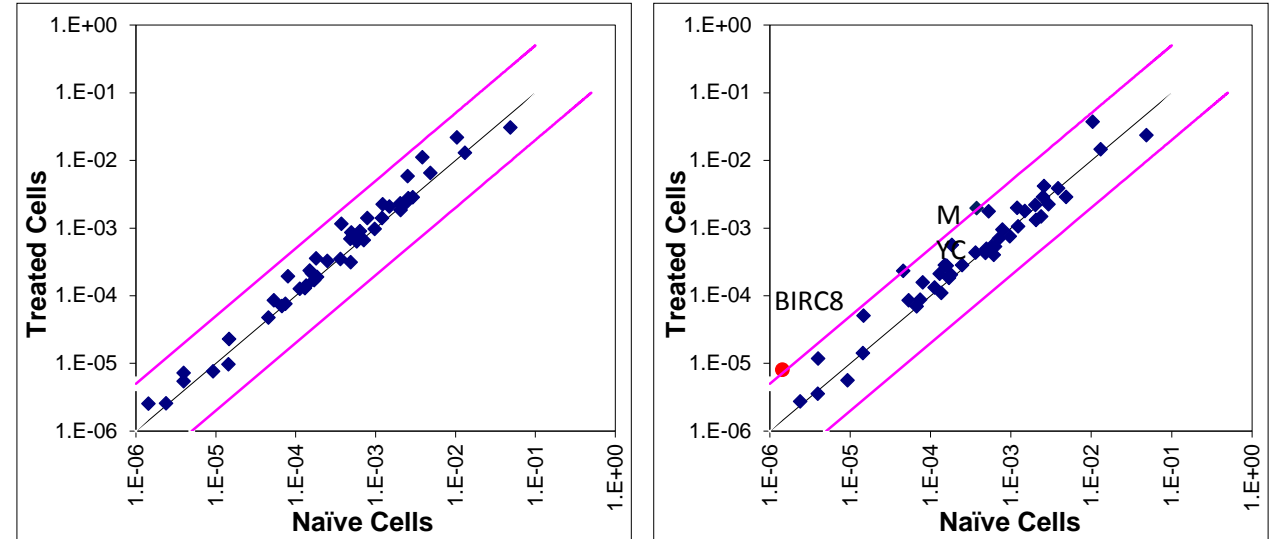

Supplement: Image_1.pdf [file Image_1.pdf]
